# Supplementary material for: Designing a cross-linked redox network for a mediated enzyme-based electrode
Source: Royal Society of Chemistry journal article supplement (doi:10.1039/d1cc01707a), 2021-01-01
Supplement: d1cc01707a1.pdf [file d1cc01707a1.pdf]

## Supplemental material

### Designing a cross-linked redox network for a mediated enzyme-based electrode

Motaher M. Hossain, Jannatul Morshed, and Seiya Tsujimura\*

*Division of Materials Science, Faculty of Pure and Applied Science, University of Tsukuba, 1-1-1, Tennodai, Tsukuba, Ibaraki 305-5358, Japan.*

## Materials

FAD-GDH from *Aspergillus terreus* and glucose oxidase from *Aspergillus* species were obtained from Ikeda Tohka Industries Co., Ltd. and Toyobo Japan. The concentration of FAD-GDH and GOx was 25.2 mg mL<sup>-1</sup>. Poly (ethylene glycol) diglycidyl ether (PEGDGE, Mn 500), and azure A chloride was purchased from Sigma-Aldrich Co. Methylene blue hydrate and Toluidine blue (Basic blue 17) were purchased from Tokyo Chemical Industry Co., Ltd., Japan. Thionine acetate, D(+)-glucose, potassium dihydrogen phosphate (KH<sub>2</sub>PO<sub>4</sub>), and dipotassium hydrogen phosphate (K<sub>2</sub>HPO<sub>4</sub>) were purchased from Fujifilm Wako Pure Chemical Corporation, Japan. A phosphate buffer (100 mM (M = mol dm<sup>-3</sup>), pH 7.0) was prepared by mixing KH<sub>2</sub>PO<sub>4</sub> and K<sub>2</sub>HPO<sub>4</sub>. A glucose solution was prepared using the phosphate buffer (100 mM, pH 7.0) and kept overnight at 4 °C to achieve mutarotation equilibrium.

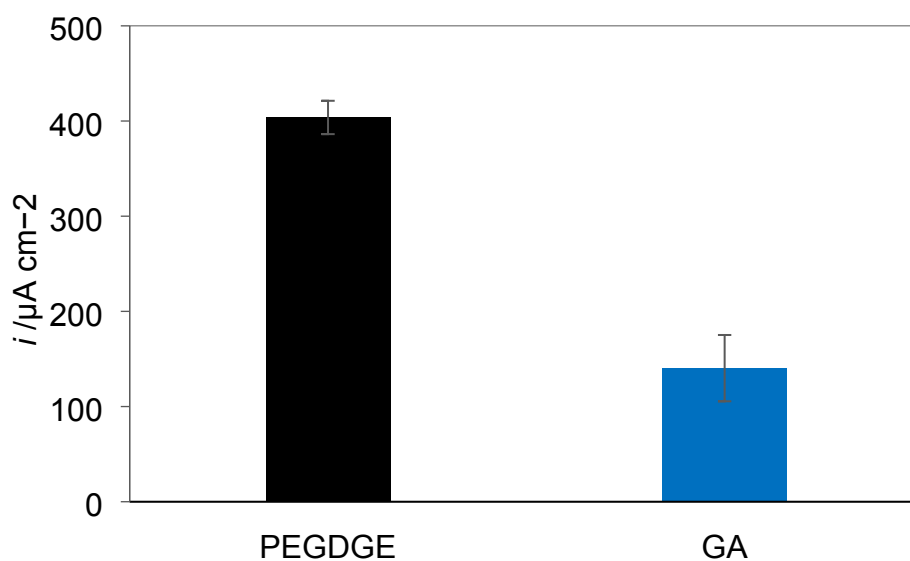

**Figure S1** Amperometric glucose oxidation current at 500 s, at 0.2 V vs. Ag|AgCl (KCl sat.) on FAD-GDH/PEGDGE/TH electrode (black bar) and FAD-GDH/Glutaraldehyde(GA)/TH electrode (blue bar). 200 mM of glucose in 100 mM phosphate buffer (pH 7.0), wt% ratio of FAD-GDH:PEGDGE(or GA):TH = 45:25:30, loading  $635 \mu\text{g}/\text{cm}^2$ , curing time 30 hours for FAD-GDH/PEGDGE/TH and 10 hours for FAD-GDH/GA/TH.

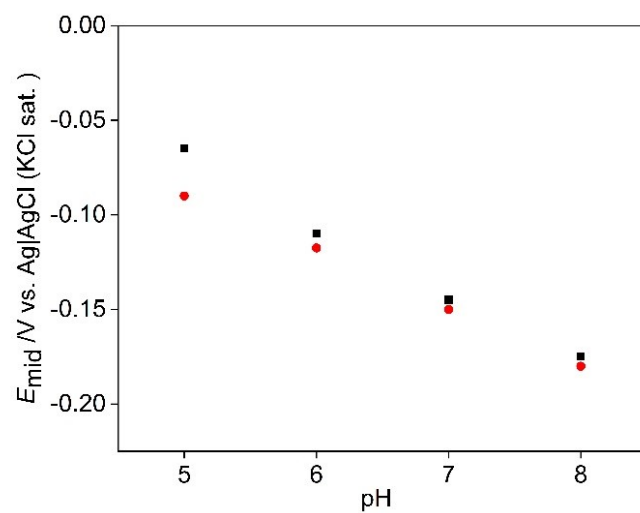

**Figure S2** Midpoint potential vs. pH of cross-linked TH on FAD-GDH/PEGDGE/TH electrode (red circle) and free TH in solution (black square).

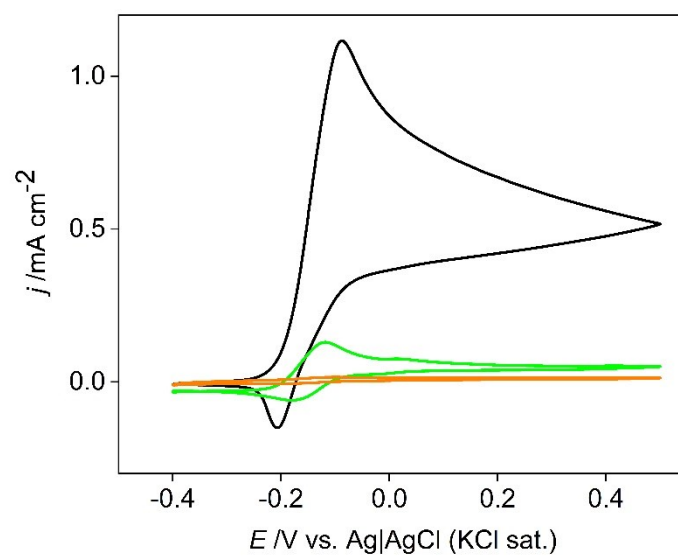

**Figure S3** Cyclic voltammograms of FAD-GDH/PEGDGE/TH (black curve), GOx/PEGDGE/TH (green curve) and FAD-GDH/TH (orange curve) electrode. 200 mM glucose in 100 mM phosphate buffer, scan rate  $5 \text{ mV s}^{-1}$ , and  $25 \text{ }^\circ\text{C}$ .

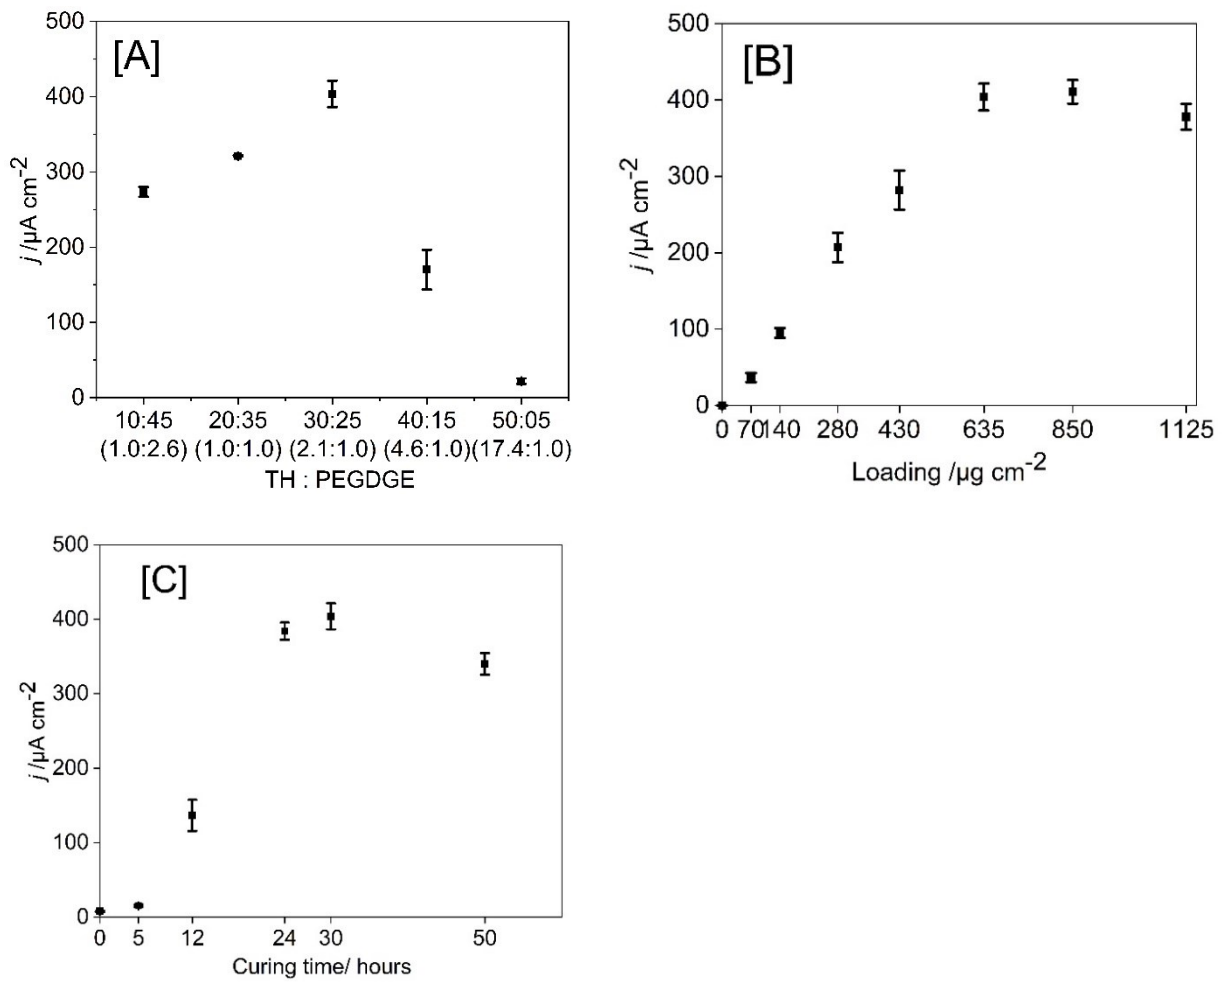

**Figure S4** Dependence of [A] wt% ratio (molar ratio) of TH and PEGDGE, [B] loading amount, and [C] curing time on glucose oxidation current density of the FAD-GDH/PEGDGE/TH electrode at 0.2 V vs. Ag|AgCl (KCl sat.), 200 mM glucose in 100 mM phosphate buffer, pH 7.0 and 25 °C.

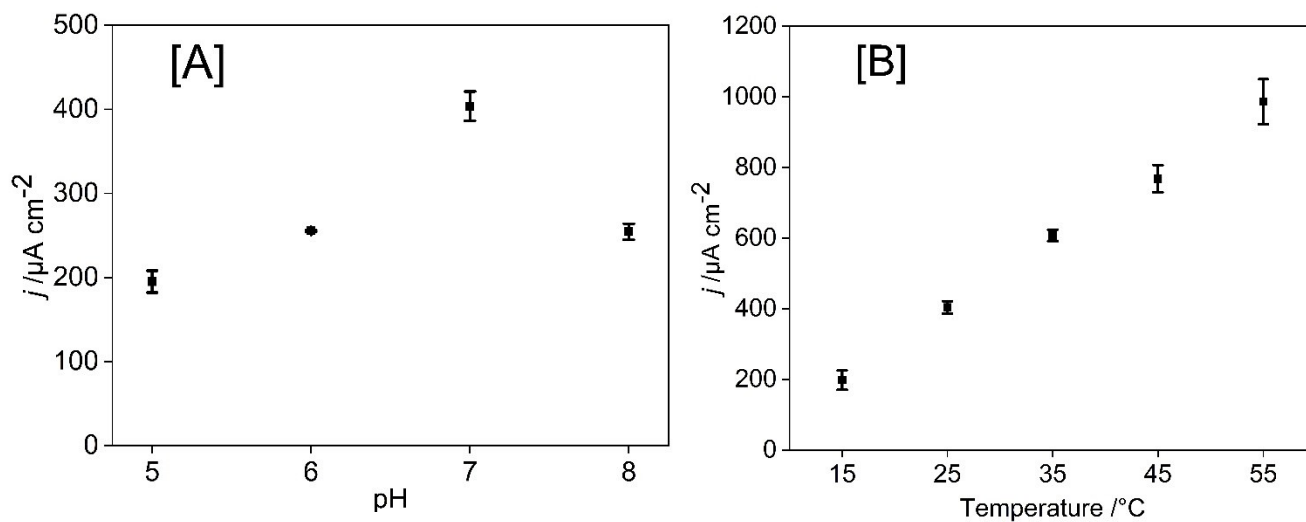

**Figure S5** FAD-GDH/PEGDGE/TH-immobilized electrode performance at various (A) pHs (under 25  $^{\circ}\text{C}$ ) and (B) temperatures (pH 7.0). Amperometric glucose oxidation current density at 0.2 V vs. Ag|AgCl (KCl sat.). 200 mM glucose. Wt% ratio of FAD-GDH:PEGDGE:TH = 45:25:30, 30 hours curing time, loading  $635 \mu\text{g/cm}^2$ .

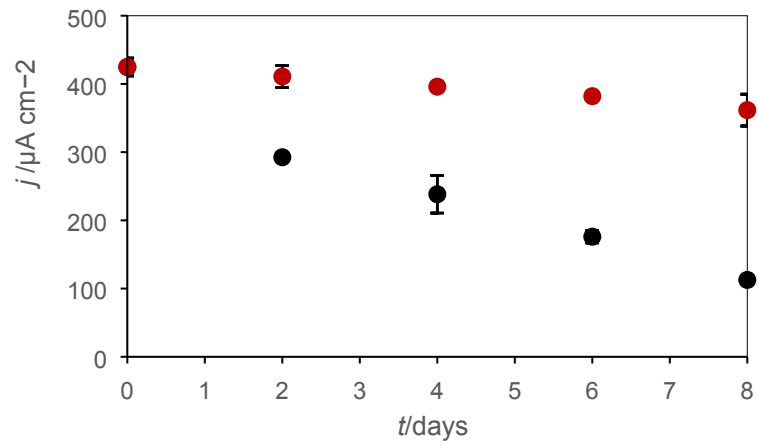

**Figure S6** Storage stability test of FAD-GDH/PEGDGE/TH-modified electrodes stored at 4 (red) and at 25 °C (black). Amperometric glucose oxidation current at 500 s, at 0.2 V vs. Ag|AgCl (KCl sat.), 200 mM of glucose in 100 mM phosphate buffer (pH 7.0), wt% ratio of FAD-GDH:PEGDGE :TH = 45:25:30, loading 635  $\mu\text{g}/\text{cm}^2$ , and 25°C.



Table S1: Covalent-immobilisation of organic redox mediator and FAD-GDH

| Immobilization type* | Enzyme  | Mediator              | Electrode             | Enzyme Loading ( $\mu\text{g cm}^{-2}$ ) | Operational Conditions: pH/glucose conc./mM | Current Density ( $\text{mA cm}^{-2}$ ) | Current Production Efficiency ( $\mu\text{A } \mu\text{g}^{-1}$ ) | Reference |
|----------------------|---------|-----------------------|-----------------------|------------------------------------------|---------------------------------------------|-----------------------------------------|-------------------------------------------------------------------|-----------|
| A                    | FAD-CDH | Toluidine blue        | Graphite              | 307                                      | 7.8/120                                     | 0.056                                   | 0.18                                                              | 1         |
| A                    | FAD-GDH | Thionine              | Buckypaper with MWCNT | 353                                      | 7/50                                        | 3.7                                     | 10.48                                                             | 2         |
| B                    | FAD-GDH | 2-Carboxyethyl-1,4-NQ | GC                    | 1126                                     | 6.0/50                                      | 1.2                                     | 1.07                                                              | 3         |
| B                    | FAD-GDH | 1,2-NQ-4-glycidyl     | GC with MWCNT         | 367                                      | 6.5/22                                      | 0.8                                     | 2.18                                                              | 4         |
| C                    | FAD-GDH | 1,2-NQ-4-glycidyl     |                       | 1980                                     | 6.5/210                                     | 0.6                                     | 0.30                                                              |           |
| D                    | FAD-GDH | Thionine              | GC                    | 282                                      | 7.0/200                                     | 0.4                                     | 1.42                                                              | This work |

\* immobilization type

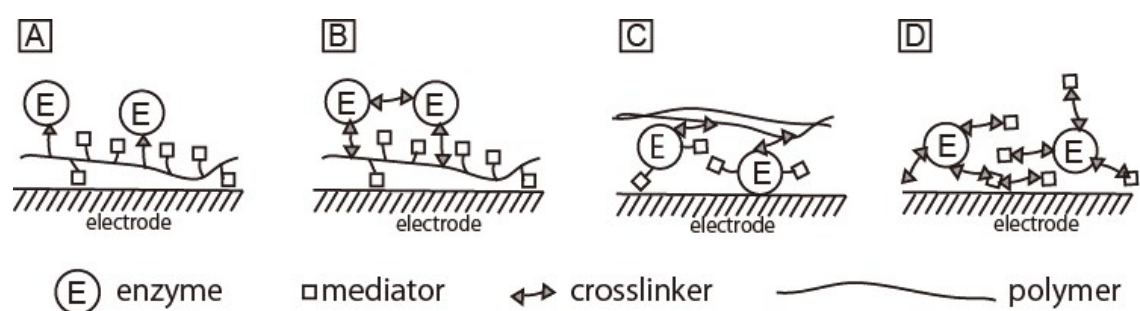

References:

- 1 Poller et al., *Electrochim. Acta*, 2013, **110**, 152–158.
- 2 Fritea et al., *J. Mater. Chem. A*, 2019, **7**, 1447-1450.
- 3 Hou et al., *Electrochim. Acta*, 2016, **211**, 663–670.
- 4 Milton et al., *Chem. Sci.*, 2015, **6**, 4867-4875.
